# Supplementary material for: First Principle Study on Electronic and Transport Properties of Finite-Length Nanoribbons and Nanodiscs for Selected Two-Dimensional Materials
Source: MDPI journal article supplement (doi:10.3390/molecules27072228), 2022-03-29

# SUPPLEMENTARY MATERIAL

## First principle study on electronic and transport properties of finite length nanoribbons and nanodisks for selected two-dimensional materials

Mirali Jafari,<sup>1</sup> and Anna Dyrdał<sup>1\*</sup>

<sup>1</sup>*Department of Mesoscopic Physics, ISQI, Faculty of Physics, Adam Mickiewicz University in Poznań,  
ul. Uniwersytetu Poznańskiego 2, 61-614 Poznań, Poland*

\* Correspondence: adyrdał@amu.edu.pl

### Table of Contents

|                                                             |    |
|-------------------------------------------------------------|----|
| I. The optimized structure of the Nanodisks .....           | 1  |
| II. Comment on the mesh cutoff chosen in calculations ..... | 19 |
| III. Comment on many-body dispersion correction .....       | 19 |

### I. The optimized structure of the Nanodisks

#### 1. Graphene Nanodisks

We have used the simple cubic lattice type with  $a=25$  Å. The positions of atoms are defined in the Cartesian coordinates.

##### 1.1 Benzene

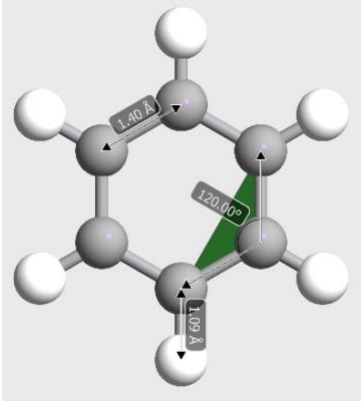

| Element  | x (Å)   | y (Å)   | z (Å) |
|----------|---------|---------|-------|
| Carbon   | 11.2902 | 13.1985 | 12.5  |
| Carbon   | 12.5    | 11.103  | 12.5  |
| Carbon   | 13.7098 | 13.1985 | 12.5  |
| Carbon   | 11.2902 | 11.8015 | 12.5  |
| Carbon   | 12.5    | 13.897  | 12.5  |
| Carbon   | 13.7098 | 11.8015 | 12.5  |
| Hydrogen | 10.348  | 13.7425 | 12.5  |
| Hydrogen | 12.5    | 10.0151 | 12.5  |
| Hydrogen | 14.652  | 13.7425 | 12.5  |
| Hydrogen | 10.348  | 11.2575 | 12.5  |
| Hydrogen | 12.5    | 14.9849 | 12.5  |
| Hydrogen | 14.652  | 11.2575 | 12.5  |

## 1.2 Zigzag hexagonal nanodisc

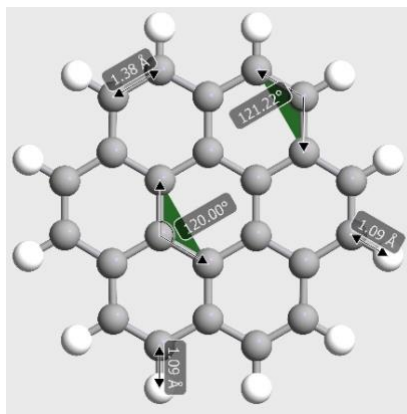

| Element | x (Å)   | y (Å)   | z (Å) | Element | x (Å)   | y (Å)   | z (Å) | Element  | x (Å)   | y (Å)   | z (Å) |
|---------|---------|---------|-------|---------|---------|---------|-------|----------|---------|---------|-------|
| Carbon  | 8.81678 | 13.1878 | 12.5  | Carbon  | 8.81678 | 11.8122 | 12.5  | Hydrogen | 7.8746  | 13.7349 | 12.5  |
| Carbon  | 10.0627 | 15.3459 | 12.5  | Carbon  | 10.0324 | 13.9247 | 12.5  | Hydrogen | 9.1178  | 15.8883 | 12.5  |
| Carbon  | 10.0324 | 11.0753 | 12.5  | Carbon  | 11.2541 | 16.0337 | 12.5  | Hydrogen | 11.2568 | 7.87681 | 12.5  |
| Carbon  | 11.2654 | 13.2128 | 12.5  | Carbon  | 10.0627 | 9.65415 | 12.5  | Hydrogen | 15.8822 | 15.8883 | 12.5  |
| Carbon  | 12.5    | 15.3493 | 12.5  | Carbon  | 11.2654 | 11.7872 | 12.5  | Hydrogen | 13.7432 | 7.87681 | 12.5  |
| Carbon  | 11.2541 | 8.96628 | 12.5  | Carbon  | 12.5    | 13.9256 | 12.5  | Hydrogen | 17.1254 | 13.7349 | 12.5  |
| Carbon  | 12.5    | 11.0744 | 12.5  | Carbon  | 13.7459 | 16.0337 | 12.5  | Hydrogen | 7.8746  | 11.2651 | 12.5  |
| Carbon  | 13.7346 | 13.2128 | 12.5  | Carbon  | 12.5    | 9.65069 | 12.5  | Hydrogen | 11.2568 | 17.1232 | 12.5  |
| Carbon  | 14.9373 | 15.3459 | 12.5  | Carbon  | 13.7346 | 11.7872 | 12.5  | Hydrogen | 9.1178  | 9.11175 | 12.5  |
| Carbon  | 13.7459 | 8.96628 | 12.5  | Carbon  | 14.9676 | 13.9247 | 12.5  | Hydrogen | 13.7432 | 17.1232 | 12.5  |
| Carbon  | 14.9676 | 11.0753 | 12.5  | Carbon  | 14.9373 | 9.65415 | 12.5  | Hydrogen | 15.8822 | 9.11175 | 12.5  |
| Carbon  | 16.1832 | 13.1878 | 12.5  | Carbon  | 16.1832 | 11.8122 | 12.5  | Hydrogen | 17.1254 | 11.2651 | 12.5  |

## 1.3 Armchair trigonal nanodisc

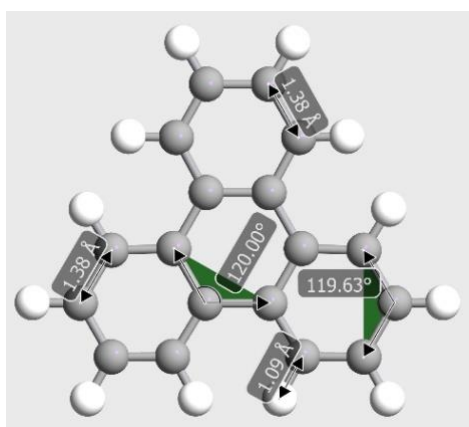

| Element | x (Å) | y (Å)   | z (Å)   | Element | x (Å) | y (Å)   | z (Å)   |
|---------|-------|---------|---------|---------|-------|---------|---------|
| Carbon  | 12.5  | 15.3546 | 9.42632 | Carbon  | 12.5  | 11.7885 | 13.139  |
| Carbon  | 12.5  | 11.0297 | 9.43532 | Carbon  | 12.5  | 13.8851 | 14.3812 |
| Carbon  | 12.5  | 13.2314 | 10.6399 | Carbon  | 12.5  | 11.7991 | 15.5845 |

|        |      |         |         |          |      |         |         |
|--------|------|---------|---------|----------|------|---------|---------|
| Carbon | 12.5 | 15.3555 | 11.8346 | Hydrogen | 12.5 | 15.8892 | 8.47881 |
| Carbon | 12.5 | 8.94455 | 10.6402 | Hydrogen | 12.5 | 11.55   | 8.48212 |
| Carbon | 12.5 | 11.0571 | 11.8722 | Hydrogen | 12.5 | 15.9209 | 12.7617 |
| Carbon | 12.5 | 13.2115 | 13.139  | Hydrogen | 12.5 | 7.8567  | 10.6511 |
| Carbon | 12.5 | 11.1149 | 14.3812 | Hydrogen | 12.5 | 10.0291 | 14.4073 |
| Carbon | 12.5 | 13.2009 | 15.5845 | Hydrogen | 12.5 | 13.7542 | 16.5212 |
| Carbon | 12.5 | 13.9703 | 9.43532 | Hydrogen | 12.5 | 13.45   | 8.48212 |
| Carbon | 12.5 | 16.0554 | 10.6402 | Hydrogen | 12.5 | 17.1433 | 10.6511 |
| Carbon | 12.5 | 9.64543 | 9.42632 | Hydrogen | 12.5 | 9.11084 | 8.47881 |
| Carbon | 12.5 | 11.7686 | 10.6399 | Hydrogen | 12.5 | 9.07906 | 12.7617 |
| Carbon | 12.5 | 13.9429 | 11.8722 | Hydrogen | 12.5 | 14.9709 | 14.4073 |
| Carbon | 12.5 | 9.64448 | 11.8346 | Hydrogen | 12.5 | 11.2458 | 16.5212 |

## 1.4 Armchair hexagonal nanodisc

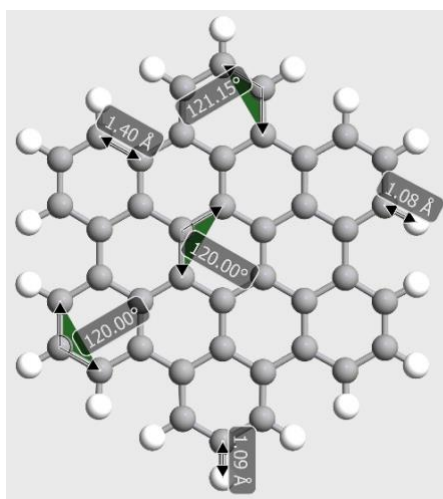

| Element | x (Å)   | y (Å)   | z (Å) | Element | x (Å)   | y (Å)   | z (Å) | Element  | x (Å)   | y (Å)   | z (Å) | Element  | x (Å)   | y (Å)   | z (Å) |
|---------|---------|---------|-------|---------|---------|---------|-------|----------|---------|---------|-------|----------|---------|---------|-------|
| Carbon  | 7.58022 | 15.3404 | 12.5  | Carbon  | 13.7299 | 8.91541 | 12.5  | Carbon   | 12.5    | 13.923  | 12.5  | Hydrogen | 8.75099 | 7.88126 | 12.5  |
| Carbon  | 7.58022 | 11.0471 | 12.5  | Carbon  | 14.9813 | 11.0674 | 12.5  | Carbon   | 13.7299 | 16.0846 | 12.5  | Hydrogen | 14.6254 | 18.0561 | 12.5  |
| Carbon  | 8.78073 | 13.2272 | 12.5  | Carbon  | 16.2193 | 13.2272 | 12.5  | Carbon   | 11.2984 | 7.51286 | 12.5  | Hydrogen | 12.5    | 5.73145 | 12.5  |
| Carbon  | 10.0106 | 15.3574 | 12.5  | Carbon  | 17.4198 | 15.3404 | 12.5  | Carbon   | 12.5    | 9.63479 | 12.5  | Hydrogen | 18.3617 | 15.8843 | 12.5  |
| Carbon  | 11.2984 | 17.4871 | 12.5  | Carbon  | 16.2181 | 8.96578 | 12.5  | Carbon   | 13.7323 | 11.7885 | 12.5  | Hydrogen | 16.249  | 7.88126 | 12.5  |
| Carbon  | 8.78185 | 8.96578 | 12.5  | Carbon  | 17.4198 | 11.0471 | 12.5  | Carbon   | 14.9813 | 13.9326 | 12.5  | Hydrogen | 18.3744 | 11.5627 | 12.5  |
| Carbon  | 10.0187 | 11.0674 | 12.5  | Carbon  | 7.58022 | 13.9529 | 12.5  | Carbon   | 16.2181 | 16.0342 | 12.5  | Hydrogen | 6.62558 | 13.4373 | 12.5  |
| Carbon  | 11.2677 | 13.2115 | 12.5  | Carbon  | 8.78185 | 16.0342 | 12.5  | Carbon   | 13.7016 | 7.51286 | 12.5  | Hydrogen | 8.75099 | 17.1187 | 12.5  |
| Carbon  | 12.5    | 15.3652 | 12.5  | Carbon  | 7.58022 | 9.65955 | 12.5  | Carbon   | 14.9894 | 9.64257 | 12.5  | Hydrogen | 6.6383  | 9.11573 | 12.5  |
| Carbon  | 13.7016 | 17.4871 | 12.5  | Carbon  | 8.78073 | 11.7728 | 12.5  | Carbon   | 16.2193 | 11.7728 | 12.5  | Hydrogen | 12.5    | 19.2685 | 12.5  |
| Carbon  | 11.2701 | 8.91541 | 12.5  | Carbon  | 10.0187 | 13.9326 | 12.5  | Carbon   | 17.4198 | 13.9529 | 12.5  | Hydrogen | 10.3746 | 6.94388 | 12.5  |
| Carbon  | 12.5    | 11.077  | 12.5  | Carbon  | 11.2701 | 16.0846 | 12.5  | Carbon   | 17.4198 | 9.65955 | 12.5  | Hydrogen | 16.249  | 17.1187 | 12.5  |
| Carbon  | 13.7323 | 13.2115 | 12.5  | Carbon  | 12.5    | 18.1809 | 12.5  | Hydrogen | 6.6383  | 15.8843 | 12.5  | Hydrogen | 14.6254 | 6.94388 | 12.5  |
| Carbon  | 14.9894 | 15.3574 | 12.5  | Carbon  | 10.0106 | 9.64257 | 12.5  | Hydrogen | 6.62558 | 11.5627 | 12.5  | Hydrogen | 18.3744 | 13.4373 | 12.5  |
| Carbon  | 12.5    | 6.81909 | 12.5  | Carbon  | 11.2677 | 11.7885 | 12.5  | Hydrogen | 10.3746 | 18.0561 | 12.5  | Hydrogen | 18.3617 | 9.11573 | 12.5  |

1.5 Zigzag trigonal nanodisc (N=4)

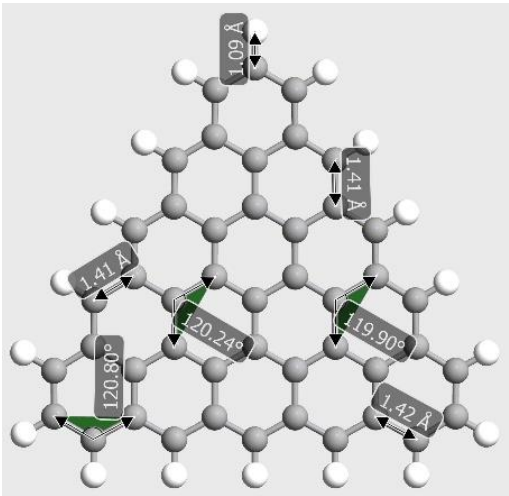

| Element | x (Å)   | y (Å)   | z (Å) | Element | x (Å)   | y (Å)   | z (Å) | Element  | x (Å)   | y (Å)   | z (Å) | Element  | x (Å)   | y (Å)   | z (Å) |
|---------|---------|---------|-------|---------|---------|---------|-------|----------|---------|---------|-------|----------|---------|---------|-------|
| Carbon  | 6.34837 | 8.93044 | 12.5  | Carbon  | 12.5    | 6.82803 | 12.5  | Carbon   | 10.0342 | 9.6595  | 12.5  | Hydrogen | 7.87057 | 13.7559 | 12.5  |
| Carbon  | 7.58374 | 11.0735 | 12.5  | Carbon  | 13.7325 | 8.95026 | 12.5  | Carbon   | 11.2656 | 11.7958 | 12.5  | Hydrogen | 9.10636 | 15.8906 | 12.5  |
| Carbon  | 8.81497 | 13.2107 | 12.5  | Carbon  | 14.9633 | 11.0822 | 12.5  | Carbon   | 12.5    | 13.9304 | 12.5  | Hydrogen | 10.3457 | 18.0306 | 12.5  |
| Carbon  | 10.0502 | 15.3456 | 12.5  | Carbon  | 16.185  | 13.2107 | 12.5  | Carbon   | 13.742  | 16.0683 | 12.5  | Hydrogen | 7.56048 | 5.74378 | 12.5  |
| Carbon  | 11.2884 | 17.487  | 12.5  | Carbon  | 14.9665 | 6.83032 | 12.5  | Carbon   | 11.2674 | 7.5097  | 12.5  | Hydrogen | 14.6543 | 18.0306 | 12.5  |
| Carbon  | 7.55991 | 6.83199 | 12.5  | Carbon  | 16.1978 | 8.94819 | 12.5  | Carbon   | 12.5    | 9.6578  | 12.5  | Hydrogen | 10.0334 | 5.74043 | 12.5  |
| Carbon  | 8.80219 | 8.94819 | 12.5  | Carbon  | 17.4163 | 11.0735 | 12.5  | Carbon   | 13.7344 | 11.7958 | 12.5  | Hydrogen | 15.8936 | 15.8906 | 12.5  |
| Carbon  | 10.0367 | 11.0822 | 12.5  | Carbon  | 17.4401 | 6.83199 | 12.5  | Carbon   | 14.9784 | 13.9373 | 12.5  | Hydrogen | 12.5    | 5.73754 | 12.5  |
| Carbon  | 11.2691 | 13.2169 | 12.5  | Carbon  | 18.6516 | 8.93044 | 12.5  | Carbon   | 13.7326 | 7.5097  | 12.5  | Hydrogen | 17.1294 | 13.7559 | 12.5  |
| Carbon  | 12.5    | 15.353  | 12.5  | Carbon  | 6.35883 | 7.53751 | 12.5  | Carbon   | 14.9658 | 9.6595  | 12.5  | Hydrogen | 14.9666 | 5.74044 | 12.5  |
| Carbon  | 13.7116 | 17.487  | 12.5  | Carbon  | 7.56173 | 9.66617 | 12.5  | Carbon   | 16.211  | 11.8024 | 12.5  | Hydrogen | 18.3602 | 11.6184 | 12.5  |
| Carbon  | 10.0336 | 6.83032 | 12.5  | Carbon  | 8.78904 | 11.8024 | 12.5  | Carbon   | 16.1963 | 7.51494 | 12.5  | Hydrogen | 17.4395 | 5.74379 | 12.5  |
| Carbon  | 11.2676 | 8.95026 | 12.5  | Carbon  | 10.0216 | 13.9373 | 12.5  | Carbon   | 17.4383 | 9.66617 | 12.5  | Hydrogen | 19.5938 | 9.47505 | 12.5  |
| Carbon  | 12.5    | 11.0831 | 12.5  | Carbon  | 11.258  | 16.0683 | 12.5  | Carbon   | 18.6412 | 7.53751 | 12.5  | Hydrogen | 5.41652 | 6.99343 | 12.5  |
| Carbon  | 13.7309 | 13.2169 | 12.5  | Carbon  | 12.5    | 18.1744 | 12.5  | Hydrogen | 5.40623 | 9.47505 | 12.5  | Hydrogen | 12.5    | 19.2625 | 12.5  |
| Carbon  | 14.9498 | 15.3456 | 12.5  | Carbon  | 8.80374 | 7.51494 | 12.5  | Hydrogen | 6.6398  | 11.6184 | 12.5  | Hydrogen | 19.5835 | 6.99343 | 12.5  |

2. Silicene Nanodiscs

We have used the simple cubic lattice (a=25 Angstrom or larger as noticed). The positions of atoms are given in the Cartesian coordinates.

## 2.1 Zigzag trigonal nanodisc N=0:

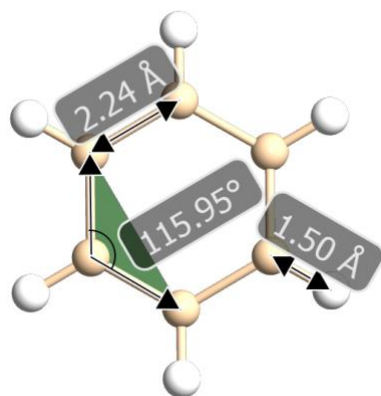

| Element  | x (Å)   | y (Å)   | z (Å)   |
|----------|---------|---------|---------|
| Silicon  | 10.6106 | 11.3869 | 12.7313 |
| Silicon  | 12.4811 | 14.695  | 12.7289 |
| Silicon  | 14.4105 | 11.4187 | 12.7254 |
| Silicon  | 10.5902 | 13.5803 | 12.2728 |
| Silicon  | 12.5185 | 10.3059 | 12.2687 |
| Silicon  | 14.3914 | 13.6143 | 12.2745 |
| Hydrogen | 9.339   | 10.6383 | 12.4638 |
| Hydrogen | 12.4679 | 16.1688 | 12.4524 |
| Hydrogen | 15.6933 | 10.6936 | 12.4462 |
| Hydrogen | 9.30667 | 14.3061 | 12.5462 |
| Hydrogen | 12.532  | 8.83117 | 12.5387 |
| Hydrogen | 15.6611 | 14.3617 | 12.5564 |

## 2.2 Zigzag trigonal nanodisc N=1:

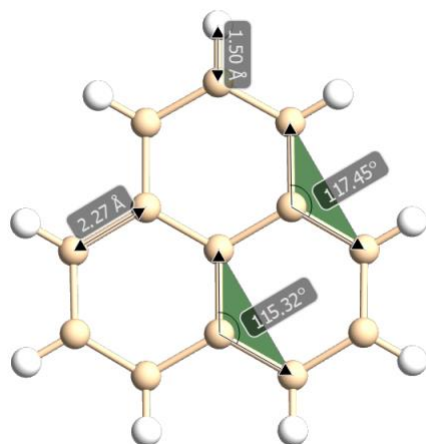

| Element | x (Å)   | y (Å)   | z (Å)   | Element  | x (Å)   | y (Å)   | z (Å)   |
|---------|---------|---------|---------|----------|---------|---------|---------|
| Silicon | 8.69298 | 9.72621 | 12.8107 | Silicon  | 14.4504 | 8.63271 | 12.2834 |
| Silicon | 10.5667 | 13.0504 | 12.719  | Silicon  | 16.3448 | 11.946  | 12.2985 |
| Silicon | 12.4744 | 16.3512 | 12.8044 | Hydrogen | 7.4029  | 8.97475 | 12.6677 |
| Silicon | 12.5075 | 9.72341 | 12.715  | Hydrogen | 12.4677 | 17.8446 | 12.6504 |
| Silicon | 14.4174 | 13.0668 | 12.7234 | Hydrogen | 17.6155 | 9.01928 | 12.6404 |
| Silicon | 16.3194 | 9.75999 | 12.7986 | Hydrogen | 7.38449 | 12.6379 | 12.6632 |
| Silicon | 8.64762 | 11.9117 | 12.3012 | Hydrogen | 9.30259 | 15.9995 | 12.645  |
| Silicon | 10.5717 | 15.2796 | 12.2908 | Hydrogen | 10.5841 | 7.15536 | 12.6513 |
| Silicon | 10.5726 | 8.61376 | 12.294  | Hydrogen | 15.6487 | 16.0312 | 12.6649 |
| Silicon | 12.4975 | 11.9477 | 12.1893 | Hydrogen | 14.4525 | 7.17298 | 12.6344 |
| Silicon | 14.3898 | 15.2973 | 12.3029 | Hydrogen | 17.6033 | 12.6806 | 12.6597 |

### 2.3 Zigzag trigonal nanodisc N=2: (Bulk size = 30 Å)

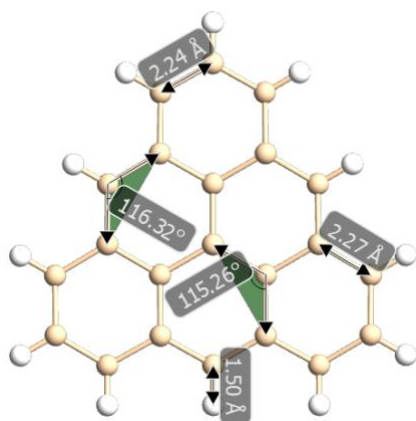

| Element | x (Å)   | y (Å)   | z (Å)   | Element  | x (Å)   | y (Å)   | z (Å)   |
|---------|---------|---------|---------|----------|---------|---------|---------|
| Silicon | 9.24632 | 10.5523 | 15.2909 | Silicon  | 15.0025 | 9.45405 | 14.7091 |
| Silicon | 11.135  | 13.8858 | 15.2214 | Silicon  | 16.9295 | 12.7698 | 14.7165 |
| Silicon | 13.0544 | 17.2196 | 15.2187 | Silicon  | 18.828  | 16.104  | 14.7213 |
| Silicon | 14.9873 | 20.5276 | 15.2872 | Silicon  | 18.8752 | 9.45863 | 14.7818 |
| Silicon | 13.0774 | 10.5335 | 15.2175 | Silicon  | 20.7756 | 12.7595 | 14.7892 |
| Silicon | 14.9933 | 13.8817 | 15.1954 | Hydrogen | 7.95773 | 9.80417 | 15.1128 |
| Silicon | 16.9255 | 17.2256 | 15.2237 | Hydrogen | 14.982  | 22.0174 | 15.1003 |
| Silicon | 16.9232 | 10.5387 | 15.2178 | Hydrogen | 22.0469 | 9.82988 | 15.0956 |
| Silicon | 18.8557 | 13.8953 | 15.2222 | Hydrogen | 7.95315 | 13.466  | 15.1288 |
| Silicon | 20.7576 | 10.5712 | 15.2835 | Hydrogen | 9.88626 | 16.8201 | 15.0509 |
| Silicon | 9.22201 | 12.7383 | 14.7969 | Hydrogen | 11.816  | 20.1825 | 15.1035 |
| Silicon | 11.1566 | 16.0927 | 14.7152 | Hydrogen | 11.1308 | 7.98256 | 15.1195 |
| Silicon | 13.0867 | 19.4495 | 14.7851 | Hydrogen | 18.1621 | 20.1914 | 15.1175 |
| Silicon | 11.1304 | 9.44456 | 14.7915 | Hydrogen | 15.0035 | 7.98919 | 15.0415 |
| Silicon | 13.062  | 12.7638 | 14.7183 | Hydrogen | 20.0935 | 16.8385 | 15.0599 |
| Silicon | 14.9921 | 16.1139 | 14.7163 | Hydrogen | 18.8832 | 7.99348 | 15.102  |
| Silicon | 16.894  | 19.4564 | 14.7918 | Hydrogen | 22.0427 | 13.4943 | 15.1153 |

## 2.4 Zigzag trigonal nanodisc N=3: (Bulk size = 35 Å)

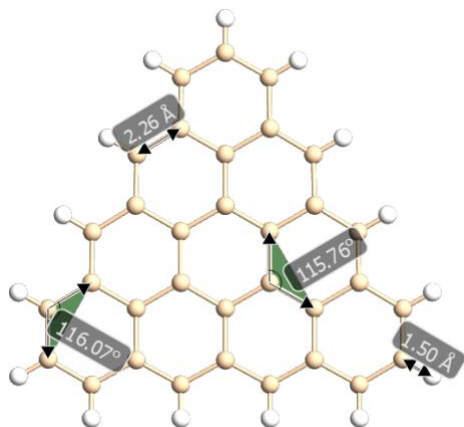

| Element | x (Å)   | y (Å)   | z (Å)   | Element  | x (Å)   | y (Å)   | z (Å)   |
|---------|---------|---------|---------|----------|---------|---------|---------|
| Silicon | 9.79105 | 13.5693 | 17.2807 | Silicon  | 15.57   | 14.7118 | 17.7679 |
| Silicon | 11.7286 | 16.9102 | 17.2376 | Silicon  | 17.4983 | 18.0569 | 17.7676 |
| Silicon | 13.6645 | 20.2722 | 17.231  | Silicon  | 19.4384 | 21.411  | 17.7656 |
| Silicon | 15.5912 | 23.6266 | 17.2737 | Silicon  | 17.5021 | 11.3393 | 17.7364 |
| Silicon | 11.6973 | 10.2714 | 17.2809 | Silicon  | 19.4319 | 14.7105 | 17.769  |
| Silicon | 13.6354 | 13.5908 | 17.3057 | Silicon  | 21.3823 | 18.0704 | 17.7417 |
| Silicon | 15.5621 | 16.9443 | 17.2963 | Silicon  | 21.3653 | 11.3559 | 17.7607 |
| Silicon | 17.4968 | 20.2925 | 17.3068 | Silicon  | 23.309  | 14.7206 | 17.7641 |
| Silicon | 19.3987 | 23.628  | 17.2766 | Silicon  | 25.1975 | 11.3887 | 17.7479 |
| Silicon | 15.563  | 10.2834 | 17.2343 | Hydrogen | 8.51421 | 14.2902 | 17.6012 |
| Silicon | 17.5006 | 13.5894 | 17.2987 | Hydrogen | 10.4539 | 17.6556 | 17.5093 |
| Silicon | 19.4346 | 16.9435 | 17.299  | Hydrogen | 12.3841 | 21.0074 | 17.5027 |
| Silicon | 21.3259 | 20.278  | 17.2385 | Hydrogen | 14.3344 | 24.3787 | 17.5912 |
| Silicon | 19.4418 | 10.2844 | 17.2338 | Hydrogen | 11.6799 | 8.8051  | 17.5979 |
| Silicon | 21.3697 | 13.597  | 17.3055 | Hydrogen | 20.6634 | 24.3694 | 17.5968 |
| Silicon | 23.2683 | 16.9218 | 17.2377 | Hydrogen | 15.5704 | 8.80755 | 17.5056 |
| Silicon | 23.3074 | 10.2827 | 17.2724 | Hydrogen | 22.6048 | 21.0158 | 17.5102 |
| Silicon | 25.2097 | 13.5782 | 17.2729 | Hydrogen | 19.4403 | 8.80758 | 17.5019 |
| Silicon | 9.80879 | 11.38   | 17.7542 | Hydrogen | 24.5451 | 17.6634 | 17.5103 |
| Silicon | 11.694  | 14.7099 | 17.7635 | Hydrogen | 23.3266 | 8.81715 | 17.5889 |
| Silicon | 13.6112 | 18.0651 | 17.7354 | Hydrogen | 26.4858 | 14.2989 | 17.5954 |
| Silicon | 15.5513 | 21.4063 | 17.7611 | Hydrogen | 8.52252 | 10.6405 | 17.5339 |
| Silicon | 17.4953 | 24.7112 | 17.7487 | Hydrogen | 17.4999 | 26.1949 | 17.5295 |
| Silicon | 13.6382 | 11.3498 | 17.7626 | Hydrogen | 26.484  | 10.6488 | 17.5292 |

## 2.5 Zigzag trigonal nanodisc N=4: (Bulk size = 40 Å)

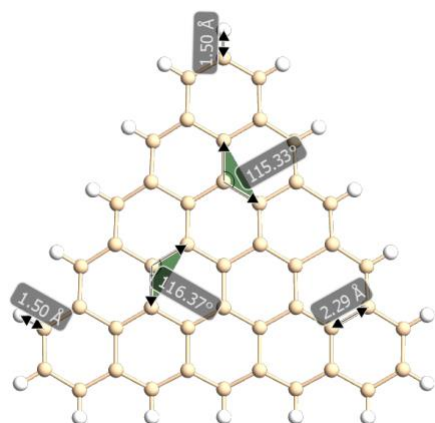

| Element | x (Å)   | y (Å)   | z (Å)   | Element  | x (Å)   | y (Å)   | z (Å)   |
|---------|---------|---------|---------|----------|---------|---------|---------|
| Silicon | 10.365  | 14.3967 | 19.7319 | Silicon  | 16.1225 | 15.5308 | 20.4045 |
| Silicon | 12.3445 | 17.7166 | 19.5481 | Silicon  | 18.0484 | 18.8961 | 20.5167 |
| Silicon | 14.2794 | 21.068  | 19.4823 | Silicon  | 19.9968 | 22.2469 | 20.4041 |
| Silicon | 16.2092 | 24.4215 | 19.5466 | Silicon  | 21.9419 | 25.5763 | 20.1968 |
| Silicon | 18.0927 | 27.7964 | 19.7244 | Silicon  | 18.0747 | 12.1673 | 20.1385 |
| Silicon | 12.2691 | 11.1043 | 19.7281 | Silicon  | 20.0002 | 15.519  | 20.5177 |
| Silicon | 14.2178 | 14.4286 | 19.7961 | Silicon  | 21.9502 | 18.8996 | 20.5147 |
| Silicon | 16.1601 | 17.7616 | 19.921  | Silicon  | 23.8888 | 22.2417 | 20.1392 |
| Silicon | 18.0845 | 21.0986 | 19.9195 | Silicon  | 21.9242 | 12.1708 | 20.1398 |
| Silicon | 19.9946 | 24.4477 | 19.7972 | Silicon  | 23.878  | 15.5374 | 20.4043 |
| Silicon | 21.8928 | 27.7981 | 19.7308 | Silicon  | 25.8179 | 18.9072 | 20.1357 |
| Silicon | 16.1332 | 11.1645 | 19.5467 | Silicon  | 25.7847 | 12.1853 | 20.1918 |
| Silicon | 18.0744 | 14.4502 | 19.9206 | Silicon  | 27.7362 | 15.5563 | 20.1924 |
| Silicon | 20.0003 | 17.7712 | 20.1359 | Silicon  | 29.6084 | 12.215  | 20.2379 |
| Silicon | 21.9115 | 21.1021 | 19.9202 | Hydrogen | 9.0945  | 15.1235 | 20.0575 |
| Silicon | 23.7811 | 24.4257 | 19.5529 | Hydrogen | 11.0532 | 18.4757 | 19.6641 |
| Silicon | 20.0009 | 11.1702 | 19.4843 | Hydrogen | 12.9838 | 21.818  | 19.6152 |
| Silicon | 21.9281 | 14.4533 | 19.9223 | Hydrogen | 14.9078 | 25.1625 | 19.6628 |
| Silicon | 23.8402 | 17.7673 | 19.9191 | Hydrogen | 16.8264 | 28.5338 | 20.0429 |
| Silicon | 25.717  | 21.0744 | 19.4832 | Hydrogen | 12.2646 | 9.64039 | 20.0517 |
| Silicon | 23.8678 | 11.173  | 19.5456 | Hydrogen | 23.1577 | 28.5364 | 20.052  |
| Silicon | 25.7835 | 14.4365 | 19.7957 | Hydrogen | 16.1459 | 9.66687 | 19.6621 |
| Silicon | 27.6565 | 17.7233 | 19.545  | Hydrogen | 25.0847 | 25.1627 | 19.6691 |
| Silicon | 27.7287 | 11.1077 | 19.7236 | Hydrogen | 20.0065 | 9.6728  | 19.6162 |
| Silicon | 29.6337 | 14.3973 | 19.7283 | Hydrogen | 27.0131 | 21.8232 | 19.6182 |
| Silicon | 10.3923 | 12.2152 | 20.2432 | Hydrogen | 23.8594 | 9.67457 | 19.655  |
| Silicon | 12.2659 | 15.5498 | 20.1953 | Hydrogen | 28.9478 | 18.4807 | 19.6661 |
| Silicon | 14.1817 | 18.901  | 20.1383 | Hydrogen | 27.7272 | 9.64387 | 20.0475 |
| Silicon | 16.1057 | 22.2375 | 20.1379 | Hydrogen | 30.9055 | 15.1231 | 20.0525 |



|         |         |         |         |          |         |         |         |
|---------|---------|---------|---------|----------|---------|---------|---------|
| Silicon | 18.0455 | 25.5747 | 20.194  | Hydrogen | 9.10108 | 11.4707 | 20.0762 |
| Silicon | 19.9916 | 28.8695 | 20.2368 | Hydrogen | 19.9947 | 30.3596 | 20.0648 |
| Silicon | 14.2162 | 12.1772 | 20.1937 | Hydrogen | 30.8996 | 11.471  | 20.069  |

## 2.6 Armchair trigonal nanodisc (bulk size: 30 Å)

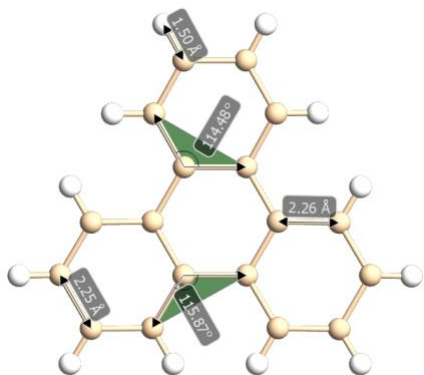

| Element | x (Å)   | y (Å)   | z (Å)   | Element  | x (Å)   | y (Å)   | z (Å)   |
|---------|---------|---------|---------|----------|---------|---------|---------|
| Silicon | 17.2403 | 10.2156 | 15.3147 | Silicon  | 16.1153 | 15.9741 | 14.7649 |
| Silicon | 20.5372 | 12.1016 | 15.1668 | Silicon  | 12.816  | 17.8783 | 14.6853 |
| Silicon | 10.5739 | 10.1941 | 15.1762 | Silicon  | 16.098  | 19.7905 | 14.8331 |
| Silicon | 13.8768 | 12.099  | 15.2358 | Hydrogen | 16.4958 | 8.93199 | 15.0932 |
| Silicon | 17.2407 | 14.0249 | 15.2349 | Hydrogen | 22.005  | 12.0689 | 14.8603 |
| Silicon | 10.5746 | 13.9957 | 15.3102 | Hydrogen | 9.81449 | 8.93586 | 14.8721 |
| Silicon | 13.8918 | 15.9708 | 15.2359 | Hydrogen | 9.82925 | 15.2772 | 15.0786 |
| Silicon | 17.1771 | 17.8904 | 15.3141 | Hydrogen | 18.6594 | 17.9054 | 15.0818 |
| Silicon | 13.8766 | 19.7854 | 15.1775 | Hydrogen | 13.1647 | 21.0693 | 14.8715 |
| Silicon | 19.4222 | 10.1804 | 14.8223 | Hydrogen | 20.1781 | 8.9219  | 15.1286 |
| Silicon | 12.757  | 10.2156 | 14.6896 | Hydrogen | 13.4939 | 8.92931 | 14.9213 |
| Silicon | 16.1262 | 12.1009 | 14.7639 | Hydrogen | 20.1855 | 15.2624 | 14.9181 |
| Silicon | 19.4312 | 13.9863 | 14.6858 | Hydrogen | 7.995   | 12.0874 | 15.1278 |
| Silicon | 9.46436 | 12.1159 | 14.8237 | Hydrogen | 11.3321 | 17.8754 | 14.9069 |
| Silicon | 12.7656 | 14.0237 | 14.7642 | Hydrogen | 16.8035 | 21.0781 | 15.1396 |

## 2.7 Armchair hexagonal nanodisc (Box size: 40Å)

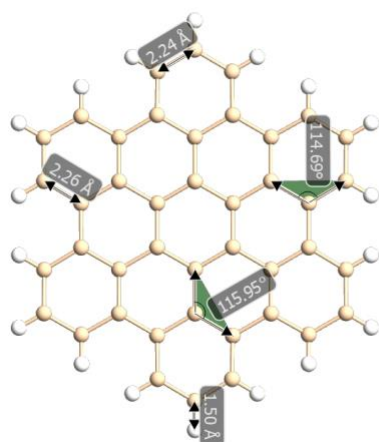

| Element | x (Å)   | y (Å)   | z (Å)   | Element  | x (Å)   | y (Å)   | z (Å)   |
|---------|---------|---------|---------|----------|---------|---------|---------|
| Silicon | 12.2946 | 24.4363 | 19.8091 | Silicon  | 20.0013 | 22.225  | 20.2518 |
| Silicon | 12.3197 | 17.7441 | 19.739  | Silicon  | 21.9247 | 25.5868 | 20.2495 |
| Silicon | 14.1994 | 21.1175 | 19.75   | Silicon  | 18.1015 | 12.2192 | 20.2642 |
| Silicon | 16.1253 | 24.4561 | 19.7501 | Silicon  | 20.0021 | 15.5339 | 20.218  |
| Silicon | 18.0958 | 27.7808 | 19.7369 | Silicon  | 21.9309 | 18.89   | 20.2516 |
| Silicon | 14.2154 | 14.4653 | 19.7358 | Silicon  | 23.8712 | 22.2392 | 20.2173 |
| Silicon | 16.138  | 17.7674 | 19.7805 | Silicon  | 25.7913 | 25.539  | 20.2639 |
| Silicon | 18.0767 | 21.1111 | 19.7477 | Silicon  | 21.8918 | 12.2184 | 20.2607 |
| Silicon | 19.9967 | 24.4683 | 19.7828 | Silicon  | 23.8757 | 15.5355 | 20.2506 |
| Silicon | 21.8876 | 27.7836 | 19.7398 | Silicon  | 25.8028 | 18.8798 | 20.2503 |
| Silicon | 18.0741 | 14.4152 | 19.7505 | Silicon  | 27.6878 | 22.2531 | 20.2617 |
| Silicon | 20.0054 | 17.777  | 19.7481 | Silicon  | 27.7028 | 15.5551 | 20.1891 |
| Silicon | 21.9293 | 21.115  | 19.7491 | Hydrogen | 11.0188 | 25.1729 | 20.0888 |
| Silicon | 23.8727 | 24.4689 | 19.7503 | Hydrogen | 11.0391 | 18.4895 | 19.9811 |
| Silicon | 19.9957 | 11.1071 | 19.8095 | Hydrogen | 16.8102 | 28.5193 | 19.9764 |
| Silicon | 21.9294 | 14.4153 | 19.7507 | Hydrogen | 14.2297 | 12.9832 | 19.9766 |
| Silicon | 23.8723 | 17.7653 | 19.7832 | Hydrogen | 23.1716 | 28.5236 | 19.9806 |
| Silicon | 25.8024 | 21.1253 | 19.7503 | Hydrogen | 19.9974 | 9.63384 | 20.0886 |
| Silicon | 27.6999 | 24.4504 | 19.8122 | Hydrogen | 28.9774 | 25.1831 | 20.0938 |
| Silicon | 25.7945 | 14.4661 | 19.7367 | Hydrogen | 25.7943 | 12.9834 | 19.9761 |
| Silicon | 27.6883 | 17.7524 | 19.7395 | Hydrogen | 28.9729 | 18.492  | 19.979  |
| Silicon | 12.3118 | 22.2397 | 20.2641 | Hydrogen | 11.0314 | 21.4923 | 20.0249 |
| Silicon | 14.2049 | 25.5227 | 20.261  | Hydrogen | 14.2085 | 27.0046 | 20.0206 |
| Silicon | 12.3039 | 15.5471 | 20.1932 | Hydrogen | 11.0259 | 14.8126 | 19.9167 |
| Silicon | 14.2042 | 18.873  | 20.2503 | Hydrogen | 19.9899 | 30.3662 | 19.9115 |
| Silicon | 16.1319 | 22.2281 | 20.2184 | Hydrogen | 16.8139 | 11.4842 | 20.0249 |
| Silicon | 18.0667 | 25.5844 | 20.2499 | Hydrogen | 25.7922 | 27.0217 | 20.0244 |
| Silicon | 19.9905 | 28.8929 | 20.1905 | Hydrogen | 23.1757 | 11.4787 | 20.0198 |

|         |         |         |         |          |         |         |         |
|---------|---------|---------|---------|----------|---------|---------|---------|
| Silicon | 16.1311 | 15.5396 | 20.2484 | Hydrogen | 28.9733 | 21.5151 | 20.0218 |
| Silicon | 18.0799 | 18.8882 | 20.2527 | Hydrogen | 28.9812 | 14.824  | 19.9072 |

## 2.8 Zigzag hexagonal nanodisc (Bulk size: 30 Å)

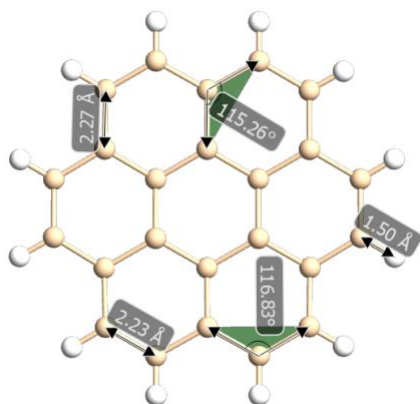

| Element | x (Å)   | y (Å)   | z (Å)   | Element  | x (Å)   | y (Å)   | z (Å)   |
|---------|---------|---------|---------|----------|---------|---------|---------|
| Silicon | 6.74042 | 13.5993 | 12.2748 | Silicon  | 14.4576 | 18.0376 | 12.7238 |
| Silicon | 8.69039 | 16.9573 | 12.2673 | Silicon  | 12.5177 | 8.04007 | 12.7321 |
| Silicon | 8.63115 | 10.2601 | 12.275  | Silicon  | 14.4348 | 11.377  | 12.7508 |
| Silicon | 10.573  | 13.6064 | 12.2391 | Silicon  | 16.3534 | 14.7185 | 12.7515 |
| Silicon | 12.5174 | 16.9567 | 12.2563 | Silicon  | 16.3487 | 8.05542 | 12.7181 |
| Silicon | 10.5776 | 6.95302 | 12.2749 | Silicon  | 18.28   | 11.4173 | 12.7239 |
| Silicon | 12.5    | 10.2686 | 12.2391 | Hydrogen | 5.46258 | 14.342  | 12.5326 |
| Silicon | 14.4276 | 13.6067 | 12.2492 | Hydrogen | 7.41206 | 17.6966 | 12.5426 |
| Silicon | 16.3448 | 16.9377 | 12.2885 | Hydrogen | 10.5818 | 5.47496 | 12.5323 |
| Silicon | 14.4607 | 6.96286 | 12.2673 | Hydrogen | 17.6337 | 17.658  | 12.5451 |
| Silicon | 16.3737 | 10.2775 | 12.2562 | Hydrogen | 14.462  | 5.48616 | 12.5427 |
| Silicon | 18.271  | 13.6015 | 12.2884 | Hydrogen | 19.5393 | 14.3578 | 12.5454 |
| Silicon | 6.73077 | 11.4189 | 12.7397 | Hydrogen | 5.44301 | 10.6961 | 12.4666 |
| Silicon | 8.65191 | 14.736  | 12.7322 | Hydrogen | 10.5866 | 19.525  | 12.4651 |
| Silicon | 10.5805 | 18.0463 | 12.7181 | Hydrogen | 7.41449 | 7.28131 | 12.4665 |
| Silicon | 8.68431 | 8.03491 | 12.7395 | Hydrogen | 14.456  | 19.5131 | 12.4557 |
| Silicon | 10.5653 | 11.3768 | 12.7609 | Hydrogen | 17.6323 | 7.32121 | 12.4651 |
| Silicon | 12.5002 | 14.7278 | 12.751  | Hydrogen | 19.557  | 10.6781 | 12.4557 |

### 3. H-BN Nanodiscs

We have used the simple cubic lattice ( $a=25$  Angstrom or larger as noticed). The positions of atoms are given in the Cartesian coordinates.

#### 3.1 Zigzag trigonal nanodisc (N=0)

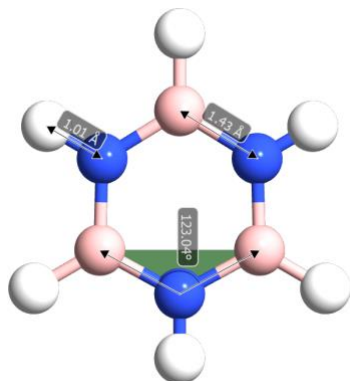

| Element  | x (Å)   | y (Å)   | z (Å) |
|----------|---------|---------|-------|
| Boron    | 11.2409 | 11.6565 | 12.5  |
| Boron    | 12.5    | 13.8373 | 12.5  |
| Boron    | 13.7591 | 11.6565 | 12.5  |
| Nitrogen | 11.2789 | 13.0885 | 12.5  |
| Nitrogen | 12.5    | 10.9735 | 12.5  |
| Nitrogen | 13.7211 | 13.0885 | 12.5  |
| Hydrogen | 10.2016 | 11.0565 | 12.5  |
| Hydrogen | 12.5    | 15.0374 | 12.5  |
| Hydrogen | 14.7984 | 11.0565 | 12.5  |
| Hydrogen | 10.4034 | 13.5939 | 12.5  |
| Hydrogen | 12.5    | 9.96256 | 12.5  |
| Hydrogen | 14.5966 | 13.5939 | 12.5  |

#### 3.2 Zigzag trigonal nanodisc (N=1)

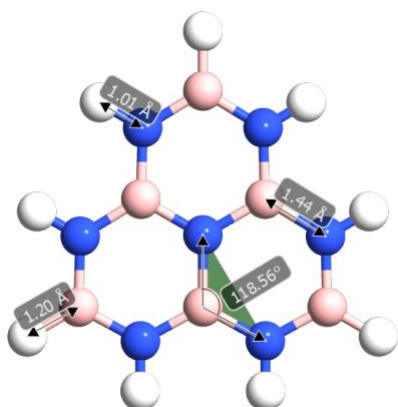

| Element  | x (Å)   | y (Å)   | z (Å) |
|----------|---------|---------|-------|
| Boron    | 9.98041 | 10.5658 | 12.5  |
| Boron    | 11.2431 | 12.7462 | 12.5  |
| Boron    | 12.5    | 14.9299 | 12.5  |
| Boron    | 12.5    | 10.5692 | 12.5  |
| Boron    | 13.7569 | 12.7462 | 12.5  |
| Boron    | 15.0196 | 10.5658 | 12.5  |
| Nitrogen | 10.014  | 11.9948 | 12.5  |
| Nitrogen | 11.2793 | 14.1865 | 12.5  |
| Nitrogen | 11.2346 | 9.8805  | 12.5  |

|          |         |         |      |
|----------|---------|---------|------|
| Nitrogen | 12.5    | 12.0206 | 12.5 |
| Nitrogen | 13.7207 | 14.1865 | 12.5 |
| Nitrogen | 13.7654 | 9.8805  | 12.5 |
| Nitrogen | 14.986  | 11.9948 | 12.5 |
| Hydrogen | 8.94029 | 9.96541 | 12.5 |
| Hydrogen | 12.5    | 16.131  | 12.5 |
| Hydrogen | 16.0597 | 9.96541 | 12.5 |
| Hydrogen | 9.13519 | 12.4956 | 12.5 |
| Hydrogen | 10.4061 | 14.697  | 12.5 |
| Hydrogen | 11.229  | 8.869   | 12.5 |
| Hydrogen | 14.5939 | 14.697  | 12.5 |
| Hydrogen | 13.771  | 8.869   | 12.5 |
| Hydrogen | 15.8648 | 12.4956 | 12.5 |

### 3.3 Zigzag trigonal nanodisc (N=2)

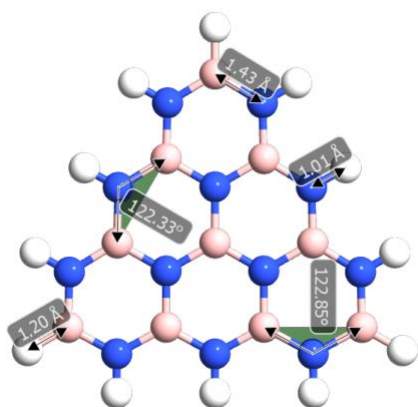

| Element  | x (Å)   | y (Å)   | z (Å) | Element  | x (Å)   | y (Å)   | z (Å) |
|----------|---------|---------|-------|----------|---------|---------|-------|
| Boron    | 8.72172 | 9.47693 | 12.5  | Nitrogen | 12.5    | 8.78966 | 12.5  |
| Boron    | 9.98637 | 11.6573 | 12.5  | Nitrogen | 13.7553 | 10.9337 | 12.5  |
| Boron    | 11.2441 | 13.8357 | 12.5  | Nitrogen | 14.9844 | 13.0929 | 12.5  |
| Boron    | 12.5    | 16.0212 | 12.5  | Nitrogen | 15.0248 | 8.79307 | 12.5  |
| Boron    | 11.2423 | 9.48198 | 12.5  | Nitrogen | 16.2438 | 10.9046 | 12.5  |
| Boron    | 12.5    | 11.6583 | 12.5  | Hydrogen | 7.68066 | 8.87604 | 12.5  |
| Boron    | 13.7559 | 13.8357 | 12.5  | Hydrogen | 12.5    | 17.2234 | 12.5  |
| Boron    | 13.7577 | 9.48198 | 12.5  | Hydrogen | 17.3193 | 8.87604 | 12.5  |
| Boron    | 15.0136 | 11.6573 | 12.5  | Hydrogen | 7.87734 | 11.4053 | 12.5  |
| Boron    | 16.2783 | 9.47693 | 12.5  | Hydrogen | 9.13821 | 13.5993 | 12.5  |
| Nitrogen | 8.75618 | 10.9046 | 12.5  | Hydrogen | 10.4078 | 15.7883 | 12.5  |
| Nitrogen | 10.0156 | 13.0929 | 12.5  | Hydrogen | 9.96947 | 7.78164 | 12.5  |
| Nitrogen | 11.2809 | 15.2778 | 12.5  | Hydrogen | 14.5922 | 15.7883 | 12.5  |
| Nitrogen | 9.97523 | 8.79307 | 12.5  | Hydrogen | 12.5    | 7.77658 | 12.5  |

|          |         |         |      |          |         |         |      |
|----------|---------|---------|------|----------|---------|---------|------|
| Nitrogen | 11.2447 | 10.9337 | 12.5 | Hydrogen | 15.8618 | 13.5993 | 12.5 |
| Nitrogen | 12.5    | 13.108  | 12.5 | Hydrogen | 15.0305 | 7.78164 | 12.5 |
| Nitrogen | 13.7191 | 15.2778 | 12.5 | Hydrogen | 17.1227 | 11.4053 | 12.5 |

### 3.4 Zigzag trigonal nanodisc (N=3)

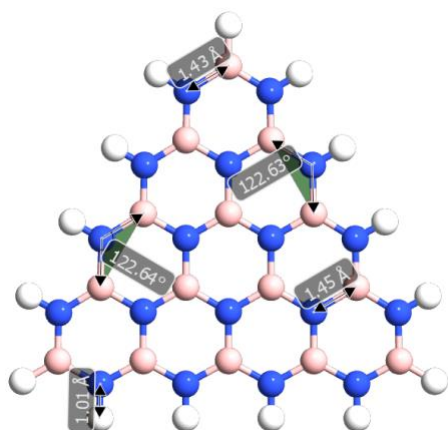

| Element  | x (Å)   | y (Å)   | z (Å) | Element  | x (Å)   | y (Å)   | z (Å) |
|----------|---------|---------|-------|----------|---------|---------|-------|
| Boron    | 7.45898 | 8.38133 | 12.5  | Nitrogen | 11.2401 | 7.69932 | 12.5  |
| Boron    | 8.72515 | 10.5623 | 12.5  | Nitrogen | 12.5    | 9.84334 | 12.5  |
| Boron    | 9.98619 | 12.7432 | 12.5  | Nitrogen | 13.7546 | 12.0164 | 12.5  |
| Boron    | 11.2443 | 14.9258 | 12.5  | Nitrogen | 14.9813 | 14.1795 | 12.5  |
| Boron    | 12.5    | 17.1129 | 12.5  | Nitrogen | 13.7599 | 7.69932 | 12.5  |
| Boron    | 9.98087 | 8.38745 | 12.5  | Nitrogen | 15.0156 | 9.83959 | 12.5  |
| Boron    | 11.2427 | 10.566  | 12.5  | Nitrogen | 16.2412 | 11.9972 | 12.5  |
| Boron    | 12.5    | 12.7436 | 12.5  | Nitrogen | 16.2874 | 7.69519 | 12.5  |
| Boron    | 13.7557 | 14.9258 | 12.5  | Nitrogen | 17.5085 | 9.81029 | 12.5  |
| Boron    | 12.5    | 8.3891  | 12.5  | Hydrogen | 6.41656 | 7.77975 | 12.5  |
| Boron    | 13.7573 | 10.566  | 12.5  | Hydrogen | 12.5    | 18.3167 | 12.5  |
| Boron    | 15.0138 | 12.7432 | 12.5  | Hydrogen | 18.5834 | 7.77975 | 12.5  |
| Boron    | 15.0191 | 8.38745 | 12.5  | Hydrogen | 6.61051 | 10.3081 | 12.5  |
| Boron    | 16.2749 | 10.5623 | 12.5  | Hydrogen | 7.8823  | 12.5022 | 12.5  |
| Boron    | 17.541  | 8.38133 | 12.5  | Hydrogen | 9.14303 | 14.6859 | 12.5  |
| Nitrogen | 7.49148 | 9.81029 | 12.5  | Hydrogen | 10.407  | 16.8842 | 12.5  |
| Nitrogen | 8.75881 | 11.9972 | 12.5  | Hydrogen | 8.70341 | 6.68331 | 12.5  |
| Nitrogen | 10.0187 | 14.1795 | 12.5  | Hydrogen | 14.593  | 16.8842 | 12.5  |
| Nitrogen | 11.2789 | 16.3705 | 12.5  | Hydrogen | 11.2393 | 6.68773 | 12.5  |
| Nitrogen | 8.71259 | 7.69519 | 12.5  | Hydrogen | 15.857  | 14.6859 | 12.5  |
| Nitrogen | 9.98441 | 9.83959 | 12.5  | Hydrogen | 13.7607 | 6.68773 | 12.5  |
| Nitrogen | 11.2454 | 12.0164 | 12.5  | Hydrogen | 17.1177 | 12.5022 | 12.5  |
| Nitrogen | 12.5    | 14.1969 | 12.5  | Hydrogen | 16.2966 | 6.68331 | 12.5  |
| Nitrogen | 13.7211 | 16.3705 | 12.5  | Hydrogen | 18.3895 | 10.3081 | 12.5  |

### 3.5 Zigzag trigonal nanodisc (N=4) (Bulk size: 30 Å)

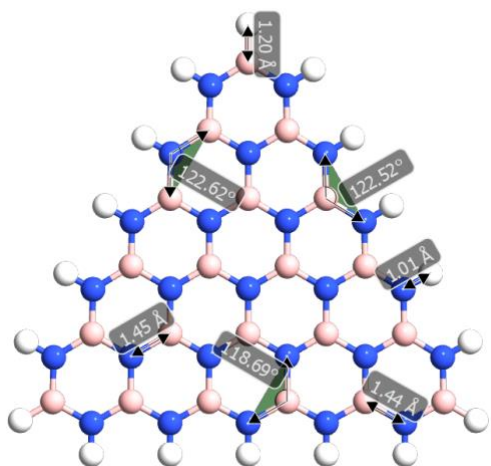

| Element  | x (Å)   | y (Å)   | z (Å) | Element  | x (Å)   | y (Å)   | z (Å) |
|----------|---------|---------|-------|----------|---------|---------|-------|
| Boron    | 8.70028 | 9.79058 | 15    | Nitrogen | 12.4822 | 9.11057 | 15    |
| Boron    | 9.96816 | 11.9713 | 15    | Nitrogen | 13.7432 | 11.2542 | 15    |
| Boron    | 11.2302 | 14.1515 | 15    | Nitrogen | 15      | 13.428  | 15    |
| Boron    | 12.4884 | 16.3308 | 15    | Nitrogen | 16.2541 | 15.6034 | 15    |
| Boron    | 13.7454 | 18.5138 | 15    | Nitrogen | 17.48   | 17.7672 | 15    |
| Boron    | 15      | 20.7023 | 15    | Nitrogen | 15      | 9.11113 | 15    |
| Boron    | 11.2228 | 9.79829 | 15    | Nitrogen | 16.2568 | 11.2542 | 15    |
| Boron    | 12.487  | 11.9769 | 15    | Nitrogen | 17.5109 | 13.4264 | 15    |
| Boron    | 13.7442 | 14.1529 | 15    | Nitrogen | 18.7383 | 15.5864 | 15    |
| Boron    | 15      | 16.3297 | 15    | Nitrogen | 17.5178 | 9.11057 | 15    |
| Boron    | 16.2546 | 18.5138 | 15    | Nitrogen | 18.7722 | 11.25   | 15    |
| Boron    | 13.7418 | 9.80112 | 15    | Nitrogen | 19.9977 | 13.4061 | 15    |
| Boron    | 15      | 11.9777 | 15    | Nitrogen | 20.0452 | 9.10622 | 15    |
| Boron    | 16.2558 | 14.1529 | 15    | Nitrogen | 21.2652 | 11.2194 | 15    |
| Boron    | 17.5116 | 16.3308 | 15    | Hydrogen | 7.65832 | 9.18926 | 15    |
| Boron    | 16.2582 | 9.80112 | 15    | Hydrogen | 15      | 21.9055 | 15    |
| Boron    | 17.513  | 11.9769 | 15    | Hydrogen | 22.3417 | 9.18926 | 15    |
| Boron    | 18.7698 | 14.1515 | 15    | Hydrogen | 7.85411 | 11.7175 | 15    |
| Boron    | 18.7772 | 9.79829 | 15    | Hydrogen | 9.12587 | 13.9119 | 15    |
| Boron    | 20.0318 | 11.9713 | 15    | Hydrogen | 10.3853 | 16.0922 | 15    |
| Boron    | 21.2997 | 9.79058 | 15    | Hydrogen | 11.6437 | 18.2731 | 15    |
| Nitrogen | 8.73475 | 11.2194 | 15    | Hydrogen | 12.908  | 20.4714 | 15    |
| Nitrogen | 10.0023 | 13.4061 | 15    | Hydrogen | 9.94604 | 8.09447 | 15    |
| Nitrogen | 11.2617 | 15.5864 | 15    | Hydrogen | 17.092  | 20.4714 | 15    |
| Nitrogen | 12.52   | 17.7672 | 15    | Hydrogen | 12.4822 | 8.09869 | 15    |

|          |         |         |    |          |         |         |    |
|----------|---------|---------|----|----------|---------|---------|----|
| Nitrogen | 13.78   | 19.9583 | 15 | Hydrogen | 18.3563 | 18.2731 | 15 |
| Nitrogen | 9.95475 | 9.10622 | 15 | Hydrogen | 15      | 8.09921 | 15 |
| Nitrogen | 11.2278 | 11.25   | 15 | Hydrogen | 19.6147 | 16.0922 | 15 |
| Nitrogen | 12.4891 | 13.4264 | 15 | Hydrogen | 17.5178 | 8.09869 | 15 |
| Nitrogen | 13.7459 | 15.6034 | 15 | Hydrogen | 20.8741 | 13.9119 | 15 |
| Nitrogen | 15      | 17.7839 | 15 | Hydrogen | 20.054  | 8.09447 | 15 |
| Nitrogen | 16.22   | 19.9583 | 15 | Hydrogen | 22.1459 | 11.7175 | 15 |

### 3.6 Armchair trigonal nanodisc

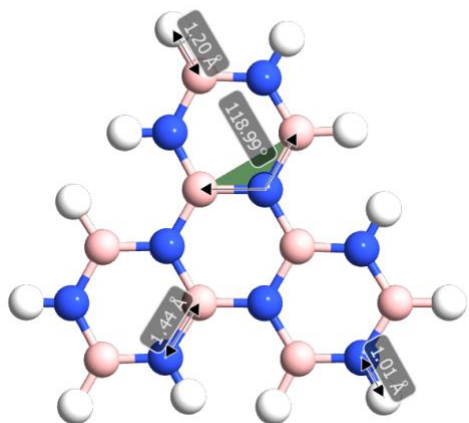

| Element  | x (Å) | y (Å)   | z (Å)   | Element  | x (Å) | y (Å)   | z (Å)   |
|----------|-------|---------|---------|----------|-------|---------|---------|
| Boron    | 12.5  | 13.8534 | 9.36378 | Nitrogen | 12.5  | 13.1158 | 13.1387 |
| Boron    | 12.5  | 16.0315 | 10.6087 | Nitrogen | 12.5  | 10.9826 | 14.4112 |
| Boron    | 12.5  | 9.46016 | 9.3441  | Nitrogen | 12.5  | 13.0852 | 15.6256 |
| Boron    | 12.5  | 11.6454 | 10.6133 | Hydrogen | 12.5  | 13.3004 | 8.29519 |
| Boron    | 12.5  | 13.8397 | 11.8664 | Hydrogen | 12.5  | 17.2321 | 10.6128 |
| Boron    | 12.5  | 9.47112 | 11.8529 | Hydrogen | 12.5  | 8.86356 | 8.30236 |
| Boron    | 12.5  | 11.6573 | 13.1401 | Hydrogen | 12.5  | 8.82235 | 12.8661 |
| Boron    | 12.5  | 13.8179 | 14.4033 | Hydrogen | 12.5  | 15.0199 | 14.4587 |
| Boron    | 12.5  | 11.6506 | 15.6672 | Hydrogen | 12.5  | 11.0469 | 16.7048 |
| Nitrogen | 12.5  | 15.2783 | 9.3872  | Hydrogen | 12.5  | 15.7715 | 8.50446 |
| Nitrogen | 12.5  | 10.882  | 9.3935  | Hydrogen | 12.5  | 11.3981 | 8.52265 |
| Nitrogen | 12.5  | 13.1093 | 10.6041 | Hydrogen | 12.5  | 15.7738 | 12.6977 |
| Nitrogen | 12.5  | 15.2779 | 11.8152 | Hydrogen | 12.5  | 7.76794 | 10.6214 |
| Nitrogen | 12.5  | 8.77902 | 10.6072 | Hydrogen | 12.5  | 9.97039 | 14.3995 |
| Nitrogen | 12.5  | 10.9174 | 11.877  | Hydrogen | 12.5  | 13.603  | 16.4941 |



### 3.7 Armchair hexagonal nanodisc (Box size: 30Å)

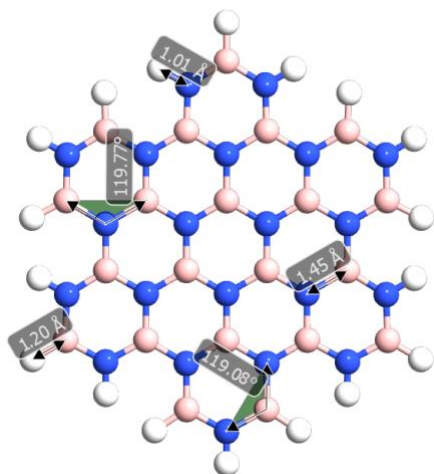

| Element  | x (Å)   | y (Å)   | z (Å) | Element  | x (Å)   | y (Å)   | z (Å) |
|----------|---------|---------|-------|----------|---------|---------|-------|
| Boron    | 9.97686 | 16.3322 | 15    | Nitrogen | 16.2134 | 19.9494 | 15    |
| Boron    | 11.2264 | 18.4967 | 15    | Nitrogen | 13.7404 | 11.2346 | 15    |
| Boron    | 9.95778 | 11.9637 | 15    | Nitrogen | 15      | 13.4209 | 15    |
| Boron    | 11.22   | 14.1411 | 15    | Nitrogen | 16.2593 | 15.6021 | 15    |
| Boron    | 12.4814 | 16.3291 | 15    | Nitrogen | 17.5228 | 17.7862 | 15    |
| Boron    | 13.7454 | 18.5154 | 15    | Nitrogen | 15      | 9.11234 | 15    |
| Boron    | 15      | 20.6974 | 15    | Nitrogen | 16.2596 | 11.2346 | 15    |
| Boron    | 12.4747 | 11.9681 | 15    | Nitrogen | 17.5165 | 13.4221 | 15    |
| Boron    | 13.7406 | 14.1478 | 15    | Nitrogen | 18.7825 | 15.6044 | 15    |
| Boron    | 15      | 16.3292 | 15    | Nitrogen | 19.9904 | 17.7564 | 15    |
| Boron    | 16.2546 | 18.5154 | 15    | Nitrogen | 18.7876 | 11.287  | 15    |
| Boron    | 13.7504 | 9.79596 | 15    | Nitrogen | 20.001  | 13.3887 | 15    |
| Boron    | 15      | 11.9666 | 15    | Hydrogen | 8.90587 | 15.7878 | 15    |
| Boron    | 16.2594 | 14.1478 | 15    | Hydrogen | 11.1625 | 19.6965 | 15    |
| Boron    | 17.5186 | 16.3291 | 15    | Hydrogen | 8.91786 | 11.3635 | 15    |
| Boron    | 18.7736 | 18.4967 | 15    | Hydrogen | 15      | 21.8982 | 15    |
| Boron    | 16.2496 | 9.79596 | 15    | Hydrogen | 12.7433 | 9.14098 | 15    |
| Boron    | 17.5253 | 11.9681 | 15    | Hydrogen | 18.8375 | 19.6965 | 15    |
| Boron    | 18.78   | 14.1411 | 15    | Hydrogen | 17.2567 | 9.14098 | 15    |
| Boron    | 20.0231 | 16.3322 | 15    | Hydrogen | 21.0941 | 15.7878 | 15    |
| Boron    | 20.0422 | 11.9637 | 15    | Hydrogen | 21.0821 | 11.3635 | 15    |
| Nitrogen | 10.0096 | 17.7564 | 15    | Hydrogen | 9.13442 | 18.2616 | 15    |
| Nitrogen | 9.99896 | 13.3887 | 15    | Hydrogen | 9.1281  | 13.903  | 15    |
| Nitrogen | 11.2175 | 15.6044 | 15    | Hydrogen | 12.9054 | 20.4459 | 15    |
| Nitrogen | 12.4772 | 17.7862 | 15    | Hydrogen | 11.2226 | 10.2756 | 15    |
| Nitrogen | 13.7866 | 19.9494 | 15    | Hydrogen | 17.0946 | 20.4459 | 15    |
| Nitrogen | 11.2124 | 11.287  | 15    | Hydrogen | 15      | 8.10178 | 15    |

|          |         |         |    |          |         |         |    |
|----------|---------|---------|----|----------|---------|---------|----|
| Nitrogen | 12.4835 | 13.4221 | 15 | Hydrogen | 20.8656 | 18.2616 | 15 |
| Nitrogen | 13.7407 | 15.6021 | 15 | Hydrogen | 18.7774 | 10.2756 | 15 |
| Nitrogen | 15      | 17.7809 | 15 | Hydrogen | 20.8719 | 13.903  | 15 |

### 3.8 Zigzag hexagonal nanodisc

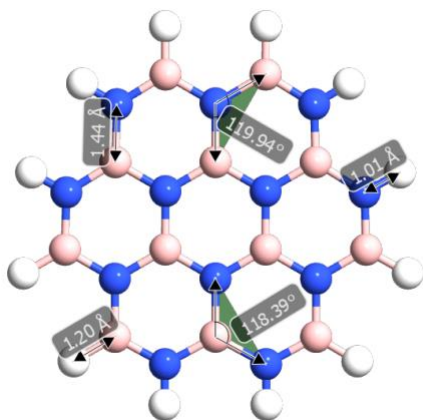

| Element  | x (Å)   | y (Å)   | z (Å) | Element  | x (Å)   | y (Å)   | z (Å) |
|----------|---------|---------|-------|----------|---------|---------|-------|
| Boron    | 8.7284  | 11.6504 | 12.5  | Nitrogen | 12.5    | 10.9337 | 12.5  |
| Boron    | 9.99114 | 13.8297 | 12.5  | Nitrogen | 13.7537 | 13.1053 | 12.5  |
| Boron    | 11.247  | 16.013  | 12.5  | Nitrogen | 14.9686 | 15.2697 | 12.5  |
| Boron    | 9.98134 | 9.48019 | 12.5  | Nitrogen | 13.7671 | 8.79929 | 12.5  |
| Boron    | 11.2431 | 11.6555 | 12.5  | Nitrogen | 15.02   | 10.9264 | 12.5  |
| Boron    | 12.5    | 13.8327 | 12.5  | Nitrogen | 16.2356 | 13.0751 | 12.5  |
| Boron    | 13.753  | 16.013  | 12.5  | Hydrogen | 7.68416 | 11.0596 | 12.5  |
| Boron    | 12.5    | 9.48418 | 12.5  | Hydrogen | 11.2368 | 17.2129 | 12.5  |
| Boron    | 13.7569 | 11.6555 | 12.5  | Hydrogen | 8.94737 | 8.87159 | 12.5  |
| Boron    | 15.0089 | 13.8297 | 12.5  | Hydrogen | 13.7632 | 17.2129 | 12.5  |
| Boron    | 15.0187 | 9.48019 | 12.5  | Hydrogen | 16.0526 | 8.87159 | 12.5  |
| Boron    | 16.2716 | 11.6504 | 12.5  | Hydrogen | 17.3158 | 11.0596 | 12.5  |
| Nitrogen | 8.76444 | 13.0751 | 12.5  | Hydrogen | 7.88286 | 13.5725 | 12.5  |
| Nitrogen | 10.0314 | 15.2697 | 12.5  | Hydrogen | 9.15971 | 15.7842 | 12.5  |
| Nitrogen | 9.98004 | 10.9264 | 12.5  | Hydrogen | 11.2231 | 7.78707 | 12.5  |
| Nitrogen | 11.2463 | 13.1053 | 12.5  | Hydrogen | 15.8403 | 15.7842 | 12.5  |
| Nitrogen | 12.5    | 15.2913 | 12.5  | Hydrogen | 13.7769 | 7.78707 | 12.5  |
| Nitrogen | 11.2329 | 8.79929 | 12.5  | Hydrogen | 17.1171 | 13.5725 | 12.5  |

## II. Comment on the mesh cut-off chosen in calculations

The Quantum ATK is a numerical-orbital code, and it is easy to think that the real-space mesh determined by the mesh cut-off also controls the basis set functions of the atomic orbitals. This is one of the reasons why the values of the cut-off energy in Quantum ATK are bigger compared to plane-wave codes (e.g., Quantum Espresso).

Below, we present the convergence process of the mesh cut-off energy for Benzene (results for the other structures are in this range of energy). The converged value comes from the tolerance of total energy with the various mesh cut-off. The Figure below shows that the total energy is converged with the  $10^{-5}$  eV/Å accuracy at the 600 Ry.

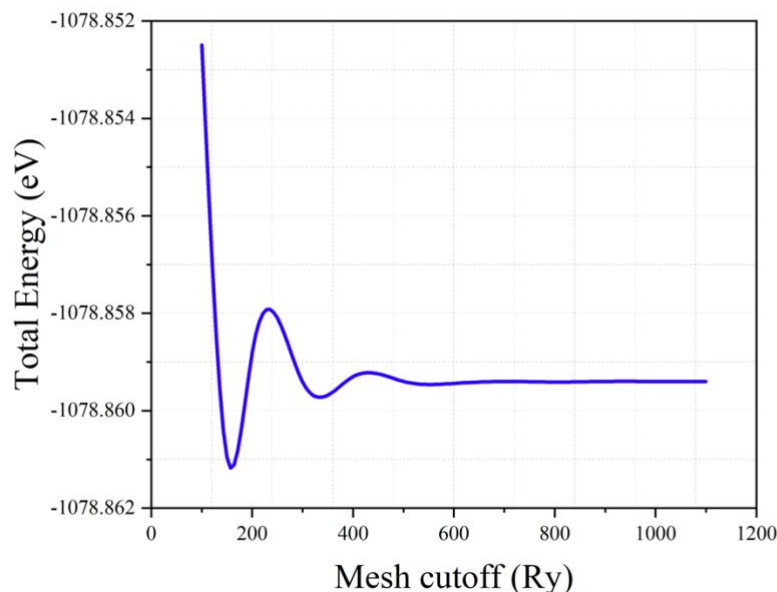

## III. Comment on many-body dispersion correction

We have considered the many-body dispersion correction for most of the calculations (Van der Waals interaction within an appropriate semi-empirical modelling correction known as Grimme DFT-D3 approximation). There is no remarkable effect on the results near the Fermi energy for the systems under our considerations. For the DFT-D3 correction process, we have optimized the structure with the Grimme DFT-D3 with the Revised Perdew Burke Ernzerhof Exchange (RPBE) functional. Then, to obtain the DOS and Molecular energy spectrum, we have included the three-body term. In the Figure presented below, which is an example of the Benzene, one can clearly see that the difference in the total density of states of the system with and without dispersion correction is negligible, and one can neglect the dispersion correction in the calculations.

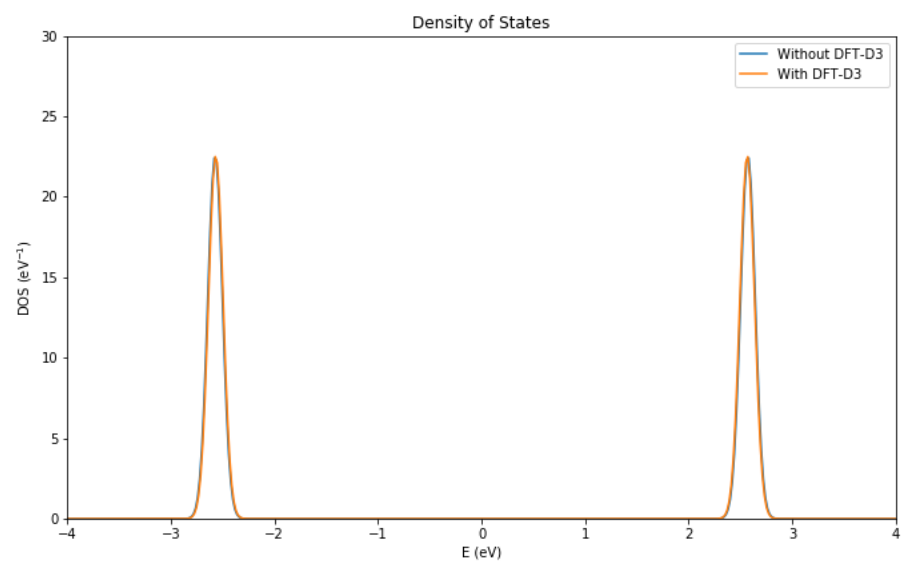

Supplement: s1 [file s1]
